# Supplementary material
Source: ML conference proceedings conference paper supplement (https://openreview.net/forum?id=MD4ifad9v5)
Supplement: supplementary_material [file attachment]

(1)

```

[
=>
=>
=>
=> with(VectorCalculus) :
=> with(LinearAlgebra) :
=>
=> with(PolynomialTools) :
=>
=>
=> #####
=> ALFstep_z := (z0, v0, h, t) → z0 + h·f(z0 + h/2·v0, t + h/2)
      ALFstep_z := (z0, v0, h, t) ↦ z0 + h·f(z0 + h·2-1·v0, t + h·2-1) (2)
=> ALFstep_v := (z0, v0, h, t) → 2·f(z0 + h/2·v0, t + h/2) - v0
      ALFstep_v := (z0, v0, h, t) ↦ 2·f(z0 + h·2-1·v0, t + h·2-1) + (-v0) (3)
=>
=> ALF2step_z := (z0, v0, h, t) → ALFstep_z(ALFstep_z(z0, v0, h/2, t), ALFstep_v(z0, v0, h/2, t),
      h/2, t + h/2)
      ALF2step_z := (z0, v0, h, t) ↦ ALFstep_z(ALFstep_z(z0, v0, h·2-1, t), ALFstep_v(z0, v0, h·2-1, (4)
      t), h·2-1, t + h·2-1)
=> ALF2step_v := (z0, v0, h, t) → ALFstep_v(ALFstep_z(z0, v0, h/2, t), ALFstep_v(z0, v0, h/2,
      t), h/2, t + h/2)
      ALF2step_v := (z0, v0, h, t) ↦ ALFstep_v(ALFstep_z(z0, v0, h·2-1, t), ALFstep_v(z0, v0, h·2-1, (5)
      t), h·2-1, t + h·2-1)
=> z0 := Vector(3, symbol=z)
      z0 := Vector(3, symbol=z) (6)
=> ##### (z1, v1) obtained by one step of ALF2
=> z1 := subs(v0=f(z0, t), collect(simplify(ALF2step_z(z0, v0, h, t)), h))
      z1 := ( f(z0 + h·f(z0, t)/4, t + h/4)
      + ( f(z0 + h·f(z0 + h·f(z0, t)/4, t + h/4) - h·f(z0, t)/4, t + 3·h/4) ) ) / 2 ) h + z0 (7)
]

```

$$\begin{aligned}
& \text{v1} := \text{collect}(\text{simplify}(\text{ALF2step\_v}(z0, v0, h, t)), h) \\
& \text{v1} := 2f\left(z0 + hf\left(z0 + \frac{h v0}{4}, t + \frac{h}{4}\right) - \frac{h v0}{4}, t + \frac{3h}{4}\right) - 2f\left(z0 + \frac{h v0}{4}, t + \frac{h}{4}\right) + v0 \quad (8)
\end{aligned}$$

##### Tayloer series when initialized at (z0,f(z0,t0)) coincide with the series for the exact from given in the Appendix A of the paper up to  $O(h^3)$

$$\begin{aligned}
& \text{Taylorv1} := h \rightarrow \text{collect}(\text{simplify}(\text{subs}(v0=f(z0, t), v1)), h) \\
& \text{Taylorv1} := h \rightarrow \text{collect}(\text{simplify}(\text{subs}(v0=f(z0, t), v1)), h) \quad (9)
\end{aligned}$$

$$\begin{aligned}
& \text{simplify}(\text{taylor}(\text{Taylorv1}(h), h=0, 3)) \\
& f(z0, t) + (D_1(f)(z0, t) f(z0, t) + D_2(f)(z0, t)) h + \left( \frac{f(z0, t)^2 D_{1,1}(f)(z0, t)}{2} \right. \\
& + \frac{(D_1(f)(z0, t)^2 + 2 D_{1,2}(f)(z0, t)) f(z0, t)}{2} + \frac{D_1(f)(z0, t) D_2(f)(z0, t)}{2} \\
& \left. + \frac{D_{2,2}(f)(z0, t)}{2} \right) h^2 + O(h^3) \quad (10)
\end{aligned}$$

$$\begin{aligned}
& \text{approx} := h \rightarrow \text{simplify}(\text{collect}(\text{subs}(v0=f(z0, t), z1), h)) : \\
& \text{approx} := \text{simplify}(\text{taylor}(\text{approx}(h), h=0, 3)) \\
& \text{approx} := z0 + f(z0, t) h + \left( \frac{D_1(f)(z0, t) f(z0, t)}{2} + \frac{D_2(f)(z0, t)}{2} \right) h^2 + O(h^3) \quad (11)
\end{aligned}$$

>  
>  
>  
>  
>  
>  
>

##### Computation of the the error between v1 and f(z1,t2) when initialized by v0 = f(z0,t0)

$$\begin{aligned}
& \text{ErrV1} := \text{collect}(\text{simplify}(v1 - f(z1, t + h)), h) : \\
& \text{approxErrV1} := h \rightarrow \text{collect}(\text{simplify}(\text{subs}(v0=f(z0, t), \text{ErrV1})), h) : \\
& \text{simplify}(\text{taylor}(\text{approxErrV1}(h), h=0, 3)) \\
& O(h^3) \quad (12)
\end{aligned}$$

>  
>  
>

##### Computation of the the error between v1 and f(z1,t2) when initialized by v0 = f(z0,t0) + const · O(h<sup>3</sup>)

$$\begin{aligned}
& z1 := \text{subs}(v0=f(z0, t) + \text{alpha} \cdot h^3, \text{collect}(\text{simplify}(Q(z0, v0, h, t)), h)) : \\
& v1 := \text{subs}(v0=f(z0, t) + \text{alpha} \cdot h^3, \text{collect}(\text{simplify}(P(z0, v0, h, t)), h)) : \\
& \text{ErrV1} := \text{collect}(\text{simplify}(v1 - f(z1, t + h)), h) :
\end{aligned}$$

(13)

(14)
